# Supplementary material for: Real-time optical spectroscopy for in situ single-droplet analysis
Source: Royal Society of Chemistry journal article supplement (doi:10.1039/d5na01087j), 2026-01-01
Supplement: d5na01087j1.pdf [file d5na01087j1.pdf]

## Supplementary Information

for

### Real-Time Optical Spectroscopy for *In-Situ* Single Droplet Analysis

Rama Pandillapally<sup>a</sup>, Pillanagrovi Jayakumar <sup>b</sup>, Shourya Dutta-Gupta<sup>b\*</sup> and Suhanya Duraiswamy<sup>a\*</sup>

---

<sup>a.</sup> *Chemical Engineering, Indian Institute of Technology Hyderabad, Sangareddy 502284, Telangana, India*

<sup>b.</sup> *Materials Science and Metallurgical Engineering, Indian Institute of Technology Hyderabad, Sangareddy 502284, Telangana, India*

\*Corresponding author email: [shourya@msme.iith.ac.in](mailto:shourya@msme.iith.ac.in) and [suhanya@che.iith.ac.in](mailto:suhanya@che.iith.ac.in)

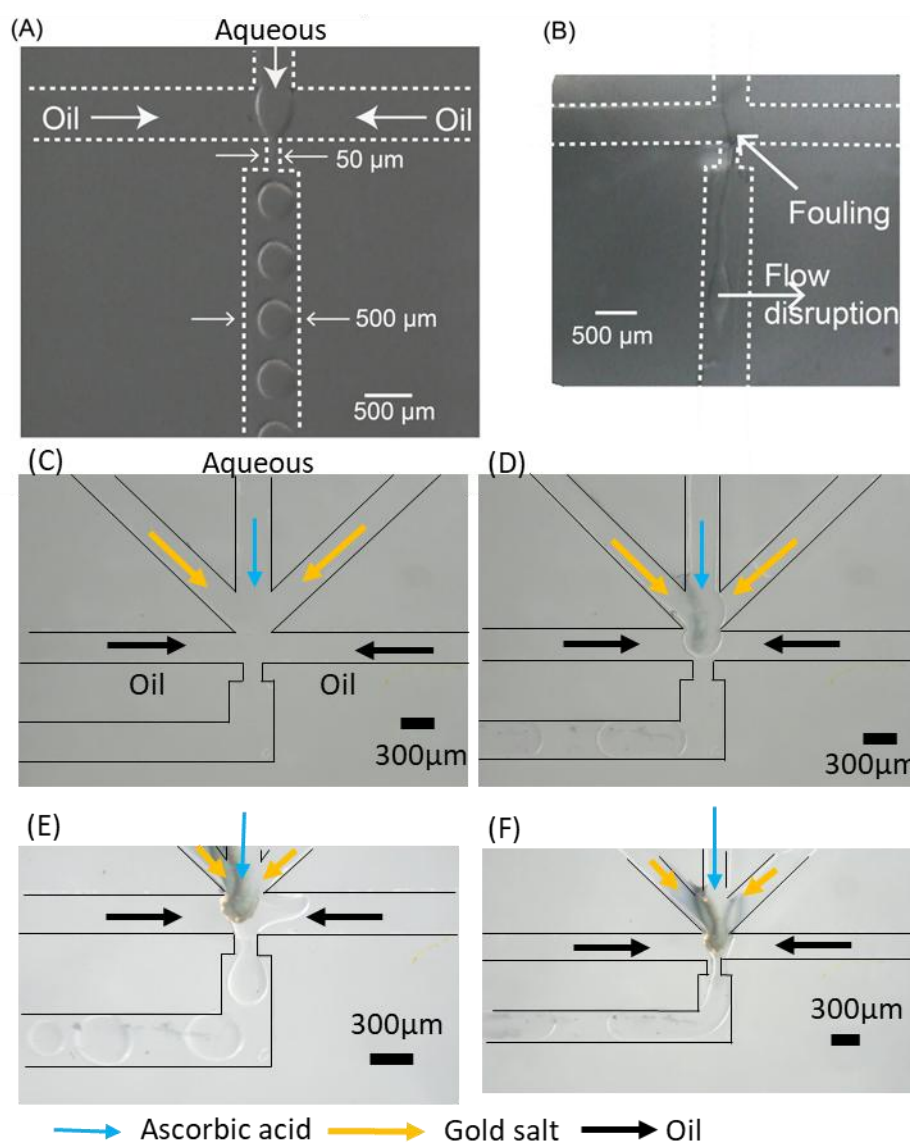

**Figure S1:** Drop generation and plasmonic nanomaterial synthesis in flow focussing device with 2 different dimensions of the narrow necking region **(A-B)** 50  $\mu\text{m}$  width and 150  $\mu\text{m}$  length and depth and **(C-F)** 200  $\mu\text{m}$  width and 200  $\mu\text{m}$  length and depth showing fouling at the necking zone and flow disruption. **A.** Spherical droplet generated in the flow-focusing device before reaction when the aqueous is only water; **B.** Formation of deposits at the necking zone and hence disruption of drop formation when water was replaced with reagents. **C.** Clean reactor before the reagents enter the channels. **D-F.** After the reagents flow in, channel deposition begins in 40 s leading to fouling near the junction and hence flow disruption. Channel deposits downstream of the necking zone is also visible in **E** and **F**.

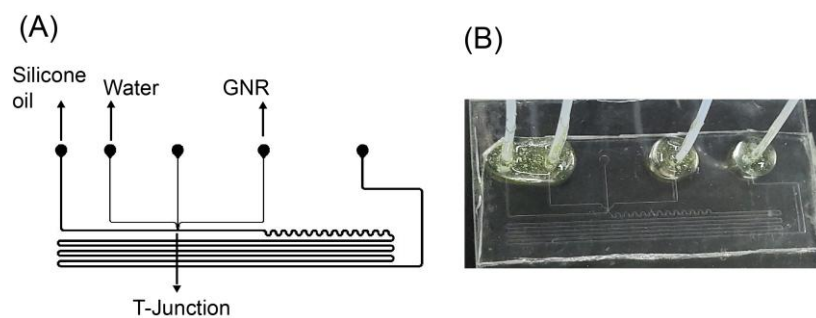

**Figure S2:** **A.** AutoCAD design drawing of the PDMS channel designs **B.** PDMS-based microfluidic device after incorporating the tubing and bonding of the chip to glass substrate.

**Table S1:** Flow rate details of Figure 3B

| $Q_a(\mu\text{L/min})$ | $Q_o(\mu\text{L/min})$ | $Q_t(\mu\text{L/min})$ | $R = Q_a/Q_o$ | $V_a(\text{cm/sec})$  | $V_o(\text{cm/sec})$ | $V_t(\text{cm/sec})$  |
|------------------------|------------------------|------------------------|---------------|-----------------------|----------------------|-----------------------|
| 2                      | 2                      | 4                      | 1             | $3.7 \times 10^{-5}$  | $7.4 \times 10^{-5}$ | $1.48 \times 10^{-4}$ |
| 4                      | 2                      | 6                      | 2             | $2.6 \times 10^{-5}$  | $7.4 \times 10^{-5}$ | $2.22 \times 10^{-4}$ |
| 6                      | 2                      | 8                      | 3             | $3.1 \times 10^{-5}$  | $7.4 \times 10^{-5}$ | $2.96 \times 10^{-4}$ |
| 8                      | 2                      | 10                     | 4             | $3.46 \times 10^{-5}$ | $7.4 \times 10^{-5}$ | $3.70 \times 10^{-4}$ |
| 10                     | 2                      | 12                     | 5             | $3.9 \times 10^{-5}$  | $7.4 \times 10^{-5}$ | $4.44 \times 10^{-4}$ |
| 12                     | 2                      | 14                     | 6             | $3.64 \times 10^{-5}$ | $7.4 \times 10^{-5}$ | $5.18 \times 10^{-4}$ |

$Q_a$ = Aqueous flow rate  $Q_o$ =Oil flow rate  $Q_t$ = Total flow rate of oil and aqueous  $V_a$ =Velocity of aqueous flow  $V_o$ =Velocity of oil flow  $V_t$ =Total velocity of oil and aqueous flow

$V_a = Q/A$ , Where the area is calculated using droplet dimensions, for other velocities  $V_o$ ,  $V_t$  The area is calculated using channel dimensions.

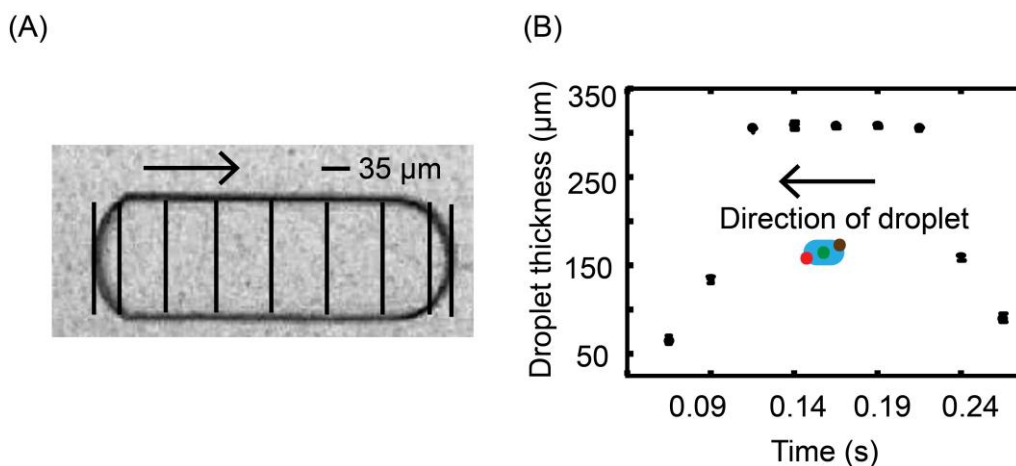

**Figure S3: Droplet Variation Studies Using Stereo and Optical Microscopy**  
**A.** The droplet image from the stereo microscope is partitioned and plotted. **B.** The droplet size was measured using stereo microscopic imaging across different time intervals and various sections of the droplet.

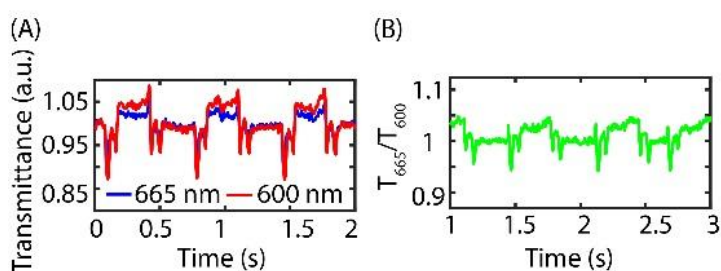

**Figure S4: A.** Normalized transmission as a function of time at two different wavelengths, i.e., at 665 nm (resonance wavelength of GNR) and 600 nm (off-resonance wavelength) for 3 sec. for water. **B.** The transmittance ratio between the two wavelengths noted in to identify the intensity variation in the oil phase and water loaded droplet region.

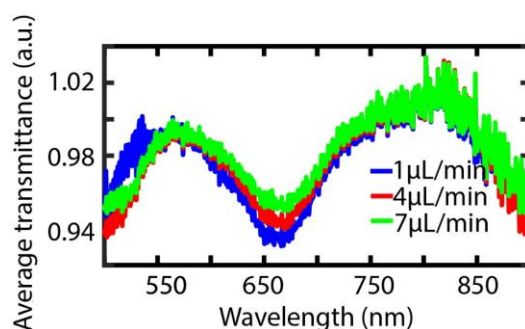

**Figure S5:** GNR average transmission spectra measured at three velocities for constant drop size for constant GNR concentration.

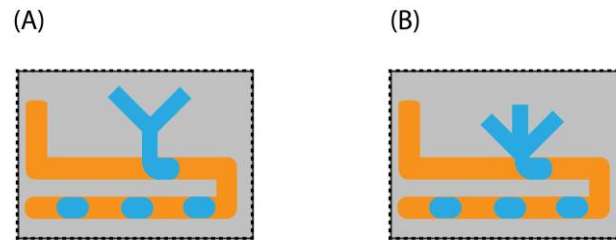

**Figure S6:** Variation of design near T-junction used for gold nanoparticle synthesis used in **A.** Case 1 – Influence of measurement location on the synthesis of gold nanoparticles (GNP) and **B.** Case 2 - Variation in the concentration of AA

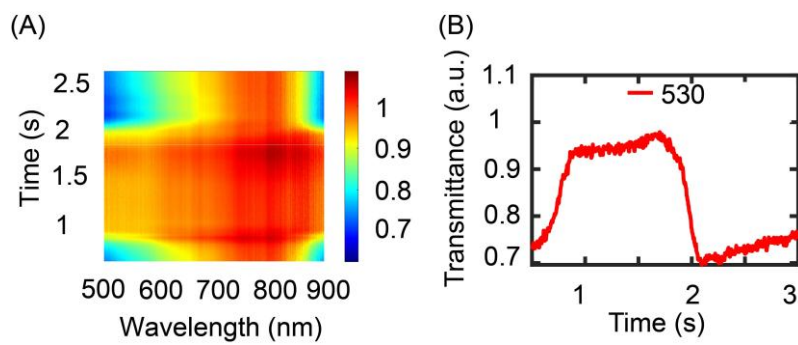

**Figure S7:** **A.** Spectral plot of GNR in the flow focusing device after fouling. **B.** Corresponding droplet analysis shows transmission vs Time
